# Supplementary material
Source: PubMed Central journal article supplement (PMC5373658)
Supplement: NIHMS847590-supplement-1.pdf [file NIHMS847590-supplement-1.pdf]

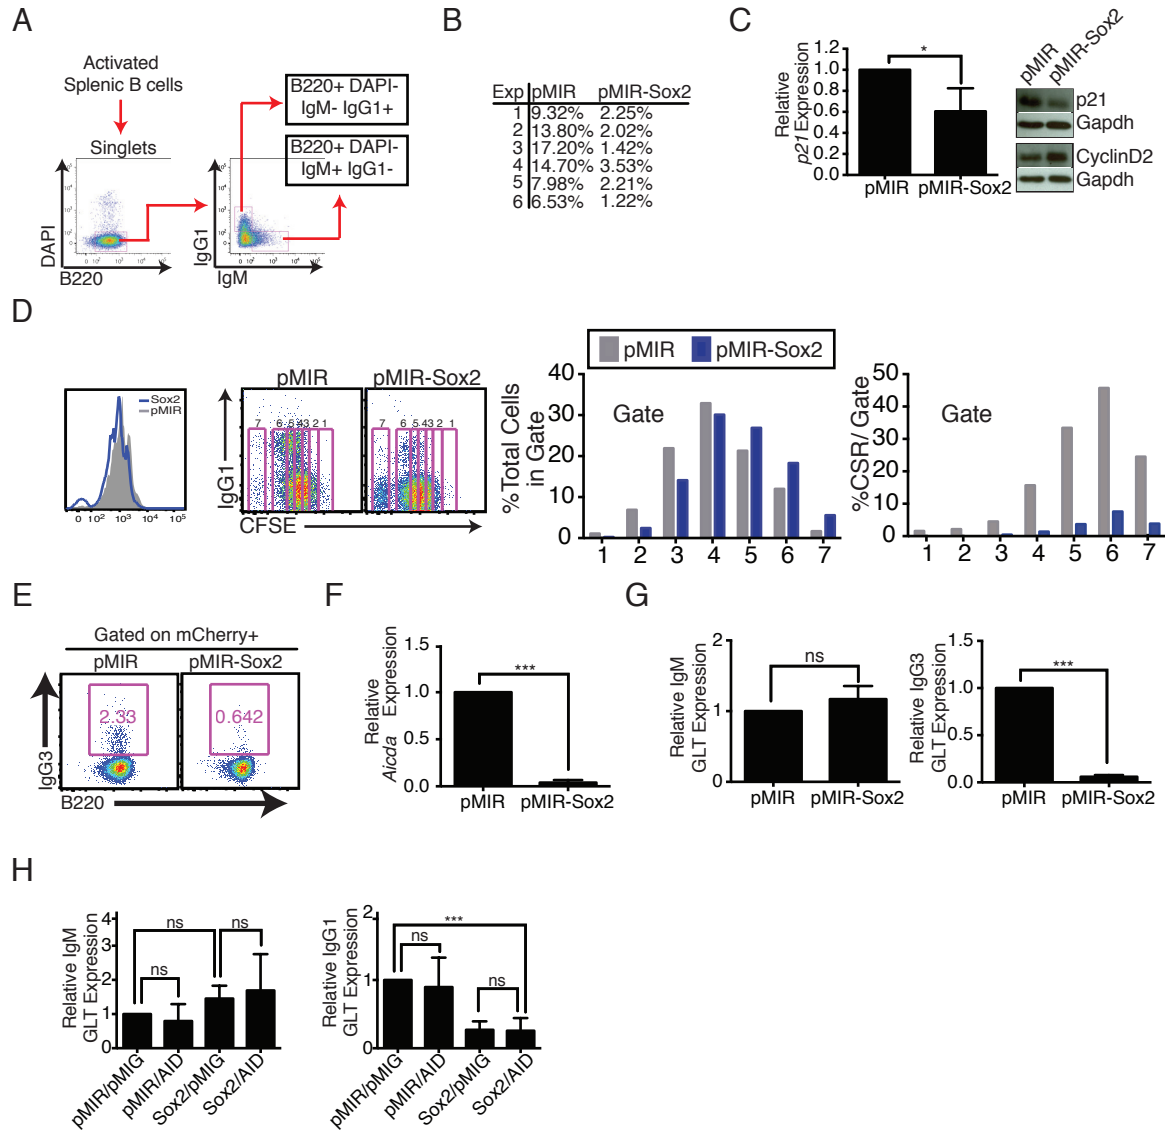

**SUPPLEMENTAL FIGURE 1.** (A) Sorting strategy for IgM<sup>+</sup> and IgG1<sup>+</sup> B cells from splenic B cell cultures activated with anti-CD40+ IL-4. (B) Representative CSR frequency in pMIR and pMIR-Sox2 transduced splenic B cells. (C) qPCR of p21 expression levels and immunoblot analysis of p21 and CyclinD2 levels in infected cells. (D) Representative sample of CFSE staining of pMIR and pMIR-Sox2 infected (mCherry<sup>+</sup>) cells. Gates were based on the uninfected sample. The total percentage of cells found in each gate and the percentage of IgG1<sup>+</sup> cells from each gate is shown in the left and right graphs, respectively. (E) Representative flow cytometry analysis of CSR to IgG3 in mCherry<sup>+</sup> cells after 72h of stimulation with LPS; n=3. (F, G) Splenic B cell cultured in LPS were transduced with pMIR or pMIR-Sox2, sorted after 72h based on mCherry expression and levels *Aicda* (F), IgM and IgG3 germline transcripts (GLTs). (G) assessed by qPCR. Expression in pMIR sample was set to 1 in each case; n = 3. (H) qPCR analysis of GLT in Sox2/AID or control pMIG/pMIR co-infected cells sorted based on co-expression of mCherry and GFP (n = 3).

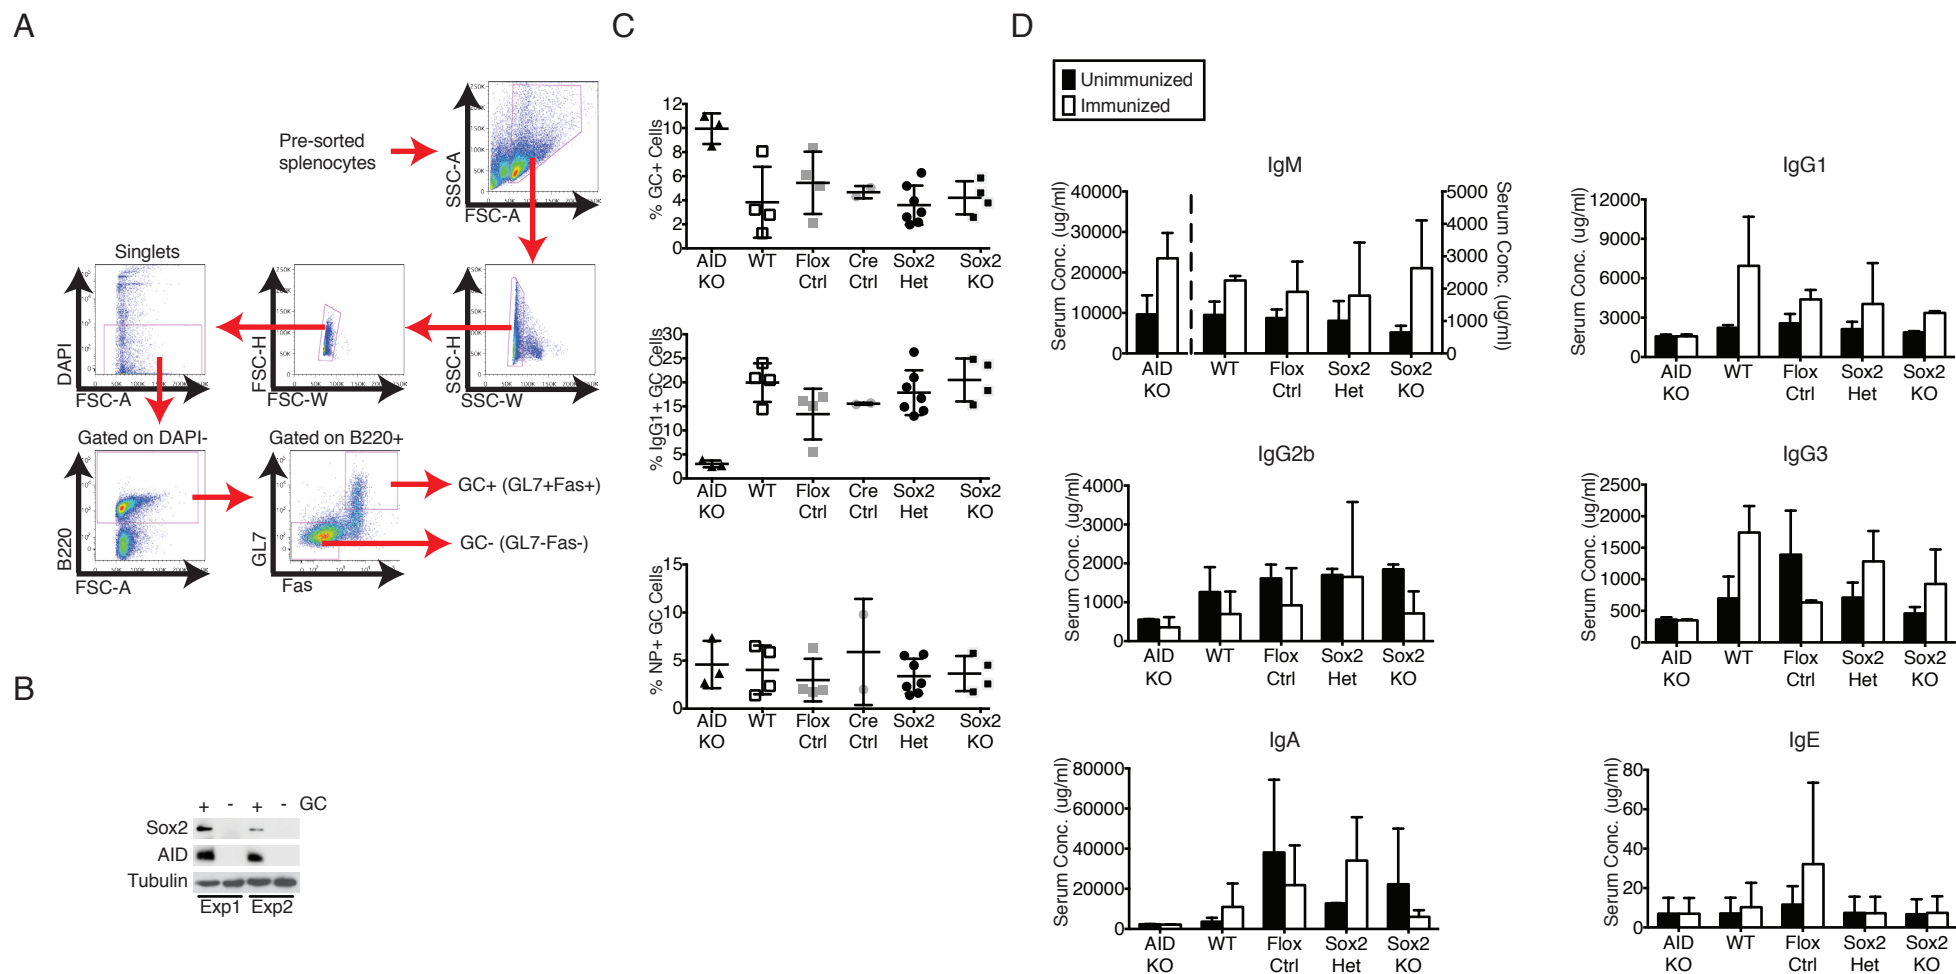

**SUPPLEMENTAL FIGURE 2.** Sox2 deletion does not impair immune response *in vivo*. (A) Representative flow cytometry for sorting germinal center (GC) B cells. B220+ splenocytes from mice immunized with NP-CGG were sorted as GC+ B cells (GL7+Fas+) and GC- B cells (GL7-Fas-). GC, germinal center; NP, (4-hydroxy-3-nitrophenyl) acetyl; CGG, chicken gamma globulin. (B) Immunoblot of protein extracts from GC+ and GC- B cells to assess expression of Sox2, AID and tubulin (loading control). (C) Frequencies of GC B cell, IgG1+ GC B cell and NP+ GC B cells from spleen in mice immunized with NP-CGG (n=7). (D) Serological analysis of immunized mice with NP-CGG by ELISA. (n=2).
